# Supplementary material for: Effect of oxymatrine on liver gluconeogenesis is associated with the regulation of PEPCK and G6Pase expression and AKT phosphorylation
Source: PubMed Central journal article supplement — Biomed Rep. 2021 Apr 27;15(1):56. doi: 10.3892/br.2021.1432 (PMC8120346; doi:10.3892/br.2021.1432), 2021-04-27

Figure S1. Chemical structure of oxymatrine.

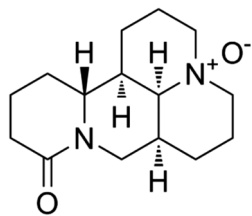

Figure S2. Schematic of the interaction between AKT and PEPCK and G6Pase. PEPCK, phosphoenolpyruvate carboxykinase; G6Pase, glucose-6-phosphatase.

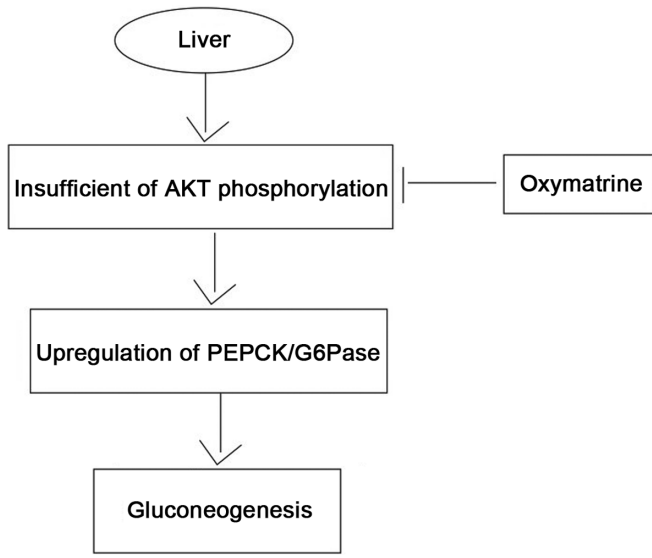

Supplement: Supplementary_Data.pdf [file Supplementary_Data.pdf]
